# Supplementary material
Source: PubMed Central journal article supplement (PMC2715300)
Supplement: NIHMS123441-supplement-Schematic_of_test_chip.pdf [file NIHMS123441-supplement-Schematic_of_test_chip.pdf]

Analytical and Bioanalytical Chemistry

Electronic Supplementary Material

## Bioconjugation Techniques for Microfluidic Biosensors

Julie M. Goddard and David Erickson\*

Email: de54@cornell.edu

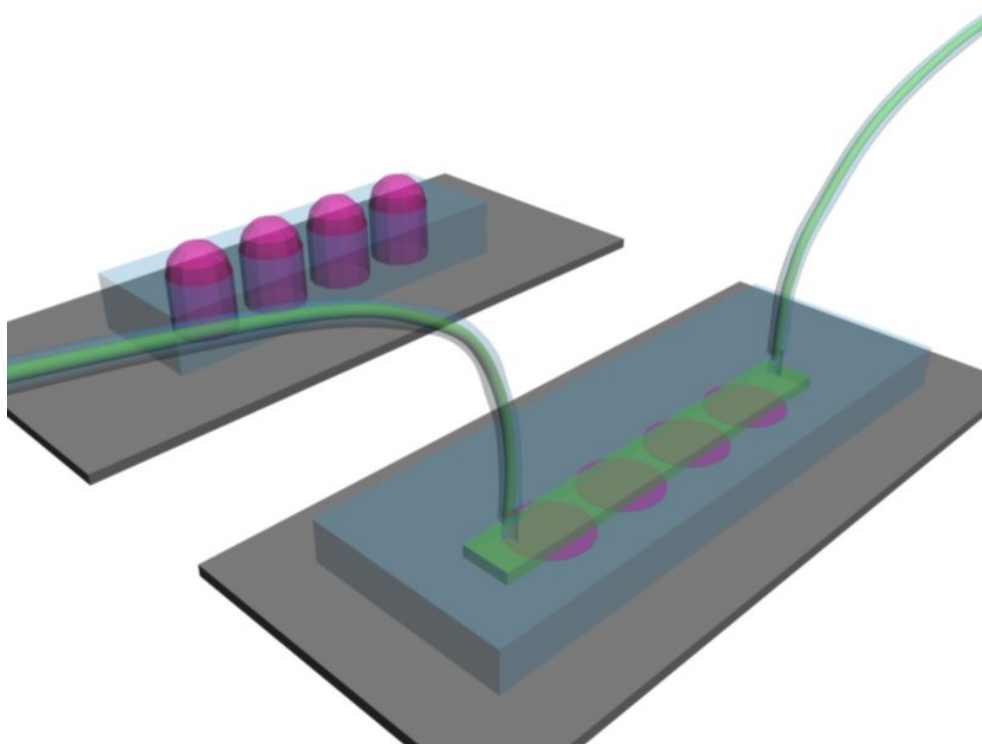

**Fig S1** Schematic of DNA Immobilization and Microfluidic Hybridization Assays. Immobilization of DNA in spots defined by a PDMS mask is depicted in the image in the back. After immobilization of DNA, a microfluidic channel (1 mm x 2 cm x 45  $\mu\text{m}$ ) is aligned over the immobilized DNA and target DNA is made to flow through the channel at 2  $\mu\text{l}$  per minute, as depicted in the image in the front.
